# Supplementary material
Source: publisher figshare collection journal article supplement (https://asha.figshare.com/articles/dataset/_/28098206)
Supplement: Supplementary file 1 [file 1]

## Supplemental Material S4. Details of the selected optimal linear mixed model for tone duration.

Linear mixed model fit by REML. t-tests use Satterthwaite's method

Formula: duration ~ 0 + target + group + grade + target:grade + (1 | speaker) + (1 | word)

REML criterion at convergence: 22168.3

Scaled residuals:

| Min     | 1Q      | Median  | 3Q     | Max   |
|---------|---------|---------|--------|-------|
| -4.1325 | -0.5919 | -0.0444 | 0.5451 | 7.454 |

Random effects:

| Groups   | Variance | Std.Dev. |
|----------|----------|----------|
| speaker  | 2005     | 44.77    |
| word     | 1178     | 34.33    |
| Residual | 5415     | 73.59    |

Number of obs: 1924, groups: speaker, 93; word, 33

Fixed effects:

|                         | Estimate | Std. Error | df       | t value | p value   |
|-------------------------|----------|------------|----------|---------|-----------|
| targetTone1             | 294.0483 | 16.4927    | 74.0764  | 17.829  | < .001*** |
| targetTone2             | 324.474  | 17.2575    | 77.121   | 18.802  | < .001*** |
| targetTone3             | 318.1898 | 15.4122    | 83.0498  | 20.645  | < .001*** |
| targetTone4             | 238.2956 | 16.5936    | 75.8936  | 14.361  | < .001*** |
| groupL2                 | 45.981   | 9.8273     | 109.9798 | 4.679   | < .001*** |
| gradeGrade3             | -43.0015 | 14.6561    | 145.6102 | -2.934  | .004**    |
| gradeGrade5             | -47.0552 | 14.4426    | 150.1376 | -3.258  | .001**    |
| targetTone2:gradeGrade3 | 20.2632  | 12.3921    | 1802.763 | 1.635   | .102      |
| targetTone3:gradeGrade3 | 30.3058  | 11.2426    | 1806.229 | 2.696   | .007**    |
| targetTone4:gradeGrade3 | 11.1889  | 12.0784    | 1811.17  | 0.926   | .354      |
| targetTone2:gradeGrade5 | -0.8634  | 12.342     | 1802.408 | -0.07   | .944      |
| targetTone3:gradeGrade5 | -6.6191  | 11.1128    | 1804.266 | -0.596  | .552      |
| targetTone4:gradeGrade5 | 22.0818  | 11.8087    | 1818.839 | 1.87    | .062      |

Significant codes: \*\*\*  $p < .001$ , \*\*  $p < .01$ , \*  $p < .05$
