# Supplementary material
Source: publisher figshare collection journal article supplement (https://asha.figshare.com/articles/dataset/_/28098206)
Supplement: Supplementary file 2 [file 1]

### Supplemental Material S3. Details of the selected optimal GAMM for *F0* contours.

Family: gaussian

Formula:  $f_0 \sim \text{tonegradegroup} + s(\text{normTime}, \text{by} = \text{tonegradegroup}) + s(\text{normTime}, \text{word}, \text{bs} = "re") + s(\text{normTime}, \text{speaker}, \text{bs} = "re")$

Parametric coefficients:

|                               | Estimate | Std. Error | <i>t</i> value | <i>p</i> value |
|-------------------------------|----------|------------|----------------|----------------|
| (Intercept)                   | 4.18222  | 0.0899     | 46.519         | < .001 ***     |
| tonegradegroupTone2.Grade1.HL | -0.51334 | 0.06658    | -7.71          | < .001 ***     |
| tonegradegroupTone3.Grade1.HL | -1.55709 | 0.0671     | -23.204        | < .001 ***     |
| tonegradegroupTone4.Grade1.HL | -0.59285 | 0.06895    | -8.598         | < .001 ***     |
| tonegradegroupTone1.Grade3.HL | 0.02543  | 0.13316    | 0.191          | .849           |
| tonegradegroupTone2.Grade3.HL | -0.49615 | 0.13864    | -3.579         | < .001 ***     |
| tonegradegroupTone3.Grade3.HL | -1.28246 | 0.13925    | -9.21          | < .001 ***     |
| tonegradegroupTone4.Grade3.HL | -0.75808 | 0.16369    | -4.631         | < .001 ***     |
| tonegradegroupTone1.Grade5.HL | -0.23292 | 0.13076    | -1.781         | .0749          |
| tonegradegroupTone2.Grade5.HL | -0.94278 | 0.13619    | -6.922         | < .001 ***     |
| tonegradegroupTone3.Grade5.HL | -1.41311 | 0.13708    | -10.308        | < .001 ***     |
| tonegradegroupTone4.Grade5.HL | -1.09354 | 0.14944    | -7.318         | < .001 ***     |
| tonegradegroupTone1.Grade1.L2 | -0.3804  | 0.13788    | -2.759         | .006 **        |
| tonegradegroupTone2.Grade1.L2 | -1.72661 | 0.1532     | -11.27         | < .001 ***     |
| tonegradegroupTone3.Grade1.L2 | -2.10087 | 0.13838    | -15.182        | < .001 ***     |
| tonegradegroupTone4.Grade1.L2 | -1.09241 | 0.16033    | -6.813         | < .001 ***     |
| tonegradegroupTone1.Grade3.L2 | -0.22076 | 0.12867    | -1.716         | .086           |
| tonegradegroupTone2.Grade3.L2 | -1.34614 | 0.13547    | -9.937         | < .001 ***     |
| tonegradegroupTone3.Grade3.L2 | -1.83165 | 0.13472    | -13.596        | < .001 ***     |
| tonegradegroupTone4.Grade3.L2 | -0.97589 | 0.14541    | -6.712         | < .001 ***     |
| tonegradegroupTone1.Grade5.L2 | -0.32136 | 0.13232    | -2.429         | .015 *         |
| tonegradegroupTone2.Grade5.L2 | -1.33157 | 0.13424    | -9.919         | < .001 ***     |
| tonegradegroupTone3.Grade5.L2 | -1.38186 | 0.13847    | -9.979         | < .001 ***     |
| tonegradegroupTone4.Grade5.L2 | -1.06527 | 0.14293    | -7.453         | < .001 ***     |

Significant codes: \*\*\*  $p < .001$ , \*\*  $p < .01$ , \*  $p < .05$

Approximate significance of smooth terms:

|                                                           | edf   | Ref.df | <i>F</i> | <i>p</i> value |
|-----------------------------------------------------------|-------|--------|----------|----------------|
| $s(\text{normTime}):\text{tonegradegroupTone1.Grade1.HL}$ | 2.439 | 3.189  | 1.578    | .189           |
| $s(\text{normTime}):\text{tonegradegroupTone2.Grade1.HL}$ | 3.884 | 4.991  | 8.706    | < .001 ***     |

|                                                  |        |       |         |            |
|--------------------------------------------------|--------|-------|---------|------------|
| <b>s(normTime):tonegradegroupTone3.Grade1.HL</b> | 8.008  | 8.677 | 113.209 | < .001 *** |
| <b>s(normTime):tonegradegroupTone4.Grade1.HL</b> | 4.422  | 5.303 | 38.41   | < .001 *** |
| <b>s(normTime):tonegradegroupTone1.Grade3.HL</b> | 1.12   | 1.232 | 0.544   | .574       |
| <b>s(normTime):tonegradegroupTone2.Grade3.HL</b> | 3.96   | 4.975 | 10.566  | < .001 *** |
| <b>s(normTime):tonegradegroupTone3.Grade3.HL</b> | 7.167  | 7.736 | 92.779  | < .001 *** |
| <b>s(normTime):tonegradegroupTone4.Grade3.HL</b> | 3.646  | 4.367 | 31.86   | < .001 *** |
| <b>s(normTime):tonegradegroupTone1.Grade5.HL</b> | 1.886  | 2.436 | 1.028   | .36        |
| <b>s(normTime):tonegradegroupTone2.Grade5.HL</b> | 4.173  | 5.235 | 11.496  | < .001 *** |
| <b>s(normTime):tonegradegroupTone3.Grade5.HL</b> | 6.673  | 7.459 | 65.5    | < .001 *** |
| <b>s(normTime):tonegradegroupTone4.Grade5.HL</b> | 4.068  | 4.814 | 46.196  | < .001 *** |
| <b>s(normTime):tonegradegroupTone1.Grade1.L2</b> | 2.634  | 3.452 | 1.946   | .111       |
| <b>s(normTime):tonegradegroupTone2.Grade1.L2</b> | 4.345  | 5.579 | 12.428  | < .001 *** |
| <b>s(normTime):tonegradegroupTone3.Grade1.L2</b> | 7.235  | 8.361 | 57.126  | < .001 *** |
| <b>s(normTime):tonegradegroupTone4.Grade1.L2</b> | 3.427  | 4.32  | 32.419  | < .001 *** |
| <b>s(normTime):tonegradegroupTone1.Grade3.L2</b> | 1.706  | 2.19  | 1.234   | .271       |
| <b>s(normTime):tonegradegroupTone2.Grade3.L2</b> | 5.109  | 6.468 | 15.999  | < .001 *** |
| <b>s(normTime):tonegradegroupTone3.Grade3.L2</b> | 6.728  | 7.977 | 50.533  | < .001 *** |
| <b>s(normTime):tonegradegroupTone4.Grade3.L2</b> | 4.336  | 5.197 | 37.656  | < .001 *** |
| <b>s(normTime):tonegradegroupTone1.Grade5.L2</b> | 2.101  | 2.74  | 1.227   | .295       |
| <b>s(normTime):tonegradegroupTone2.Grade5.L2</b> | 4.851  | 6.047 | 18.543  | < .001 *** |
| <b>s(normTime):tonegradegroupTone3.Grade5.L2</b> | 5.559  | 6.697 | 26.986  | < .001 *** |
| <b>s(normTime):tonegradegroupTone4.Grade5.L2</b> | 3.991  | 4.875 | 35.837  | < .001 *** |
| <b>s(normTime,word)</b>                          | 19.8   | 28    | 3.805   | < .001 *** |
| <b>s(normTime,speaker)</b>                       | 71.947 | 76    | 21.41   | < .001 *** |

Significant codes: \*\*\*  $p < .001$ , \*\*  $p < .01$ , \*  $p < .05$

---

$R\text{-sq.}(adj) = .548$  Deviance explained = 55.5%

$fREML = 6925.5$  Scale est. = 0.31033  $n = 14570$
