# Supplementary material
Source: publisher figshare collection journal article supplement (https://asha.figshare.com/articles/dataset/_/28098206)
Supplement: Supplementary file 3 [file 1]

**Supplemental Material S1.** Mean duration of tone productions in each subgroup\* to convert equal normalized durations to differentiated normalized durations.

| Target | Transcription | Grade | Group | Mean (ms) | $d^{**}$ |
|--------|---------------|-------|-------|-----------|----------|
| 1      | 1             | 0     | 0     | 292.7866  | 0.6762   |
| 1      | 1             | 1     | 1     | 304.098   | 0.7023   |
| 1      | 1             | 1     | 2     | 337.8952  | 0.7804   |
| 1      | 1             | 3     | 1     | 233.2812  | 0.5388   |
| 1      | 1             | 3     | 2     | 307.9042  | 0.7111   |
| 1      | 1             | 5     | 1     | 256.2571  | 0.5918   |
| 1      | 1             | 5     | 2     | 299.964   | 0.6928   |
| 1      | 2             | 1     | 1     | 218.8064  | 0.5053   |
| 1      | 2             | 1     | 2     | 331.6113  | 0.7658   |
| 1      | 2             | 3     | 1     | 275.5768  | 0.6364   |
| 1      | 2             | 3     | 2     | 341.3642  | 0.7884   |
| 1      | 2             | 5     | 1     | 261.8408  | 0.6047   |
| 1      | 2             | 5     | 2     | 257.0812  | 0.5937   |
| 1      | 3             | 1     | 2     | 362.8879  | 0.8381   |
| 1      | 3             | 3     | 2     | 355.678   | 0.8214   |
| 1      | 3             | 5     | 2     | 315.6543  | 0.7290   |
| 1      | 4             | 0     | 0     | 150.4315  | 0.3474   |
| 1      | 4             | 1     | 2     | 305.0115  | 0.7044   |
| 1      | 4             | 3     | 2     | 151.3078  | 0.3494   |
| 1      | 4             | 5     | 1     | 127.0545  | 0.2934   |
| 1      | 4             | 5     | 2     | 150.3805  | 0.3473   |
| 1      | 7             | 1     | 1     | 294.9072  | 0.6811   |

|   |   |   |   |          |        |
|---|---|---|---|----------|--------|
| 1 | 7 | 1 | 2 | 424.9883 | 0.9815 |
| 1 | 7 | 3 | 2 | 377.3237 | 0.8714 |
| 1 | 7 | 5 | 1 | 218.6863 | 0.5050 |
| 1 | 7 | 5 | 2 | 258.7265 | 0.5975 |
| 2 | 1 | 1 | 1 | 224.9419 | 0.5195 |
| 2 | 1 | 3 | 2 | 355.5045 | 0.8210 |
| 2 | 1 | 5 | 2 | 383.1165 | 0.8848 |
| 2 | 2 | 0 | 0 | 291.0445 | 0.6722 |
| 2 | 2 | 1 | 1 | 325.6172 | 0.7520 |
| 2 | 2 | 1 | 2 | 411.9192 | 0.9513 |
| 2 | 2 | 3 | 1 | 269.6184 | 0.6227 |
| 2 | 2 | 3 | 2 | 392.6003 | 0.9067 |
| 2 | 2 | 5 | 1 | 285.074  | 0.6584 |
| 2 | 2 | 5 | 2 | 324.1729 | 0.7487 |
| 2 | 3 | 1 | 1 | 356.1816 | 0.8226 |
| 2 | 3 | 1 | 2 | 372.7262 | 0.8608 |
| 2 | 3 | 3 | 1 | 279.3431 | 0.6451 |
| 2 | 3 | 3 | 2 | 394.8265 | 0.9118 |
| 2 | 3 | 5 | 1 | 331.1964 | 0.7649 |
| 2 | 3 | 5 | 2 | 352.8528 | 0.8149 |
| 2 | 4 | 1 | 2 | 295.3422 | 0.6821 |
| 2 | 6 | 1 | 1 | 135.9296 | 0.3139 |
| 2 | 6 | 1 | 2 | 346.3776 | 0.7999 |
| 2 | 6 | 5 | 1 | 101.7302 | 0.2349 |
| 2 | 6 | 5 | 2 | 99.1276  | 0.2289 |

|   |   |   |   |          |        |
|---|---|---|---|----------|--------|
| 2 | 7 | 0 | 0 | 183.5777 | 0.4240 |
| 2 | 7 | 1 | 1 | 344.5162 | 0.7956 |
| 2 | 7 | 3 | 1 | 214.3274 | 0.4950 |
| 2 | 7 | 3 | 2 | 288.8446 | 0.6671 |
| 2 | 7 | 5 | 2 | 227.1053 | 0.5245 |
| 3 | 1 | 1 | 1 | 266.542  | 0.6156 |
| 3 | 1 | 1 | 2 | 323.7469 | 0.7477 |
| 3 | 1 | 3 | 2 | 227.0788 | 0.5244 |
| 3 | 1 | 5 | 1 | 261.0106 | 0.6028 |
| 3 | 1 | 5 | 2 | 257.0509 | 0.5937 |
| 3 | 2 | 1 | 1 | 186.5576 | 0.4308 |
| 3 | 2 | 1 | 2 | 362.9013 | 0.8381 |
| 3 | 2 | 3 | 1 | 275.9791 | 0.6374 |
| 3 | 2 | 3 | 2 | 353.5356 | 0.8165 |
| 3 | 2 | 5 | 1 | 329.9448 | 0.7620 |
| 3 | 2 | 5 | 2 | 294.6177 | 0.6804 |
| 3 | 3 | 0 | 0 | 329.9243 | 0.7619 |
| 3 | 3 | 1 | 1 | 357.187  | 0.8249 |
| 3 | 3 | 1 | 2 | 380.215  | 0.8781 |
| 3 | 3 | 3 | 1 | 304.0069 | 0.7021 |
| 3 | 3 | 3 | 2 | 375.0078 | 0.8661 |
| 3 | 3 | 5 | 1 | 305.5773 | 0.7057 |
| 3 | 3 | 5 | 2 | 316.3496 | 0.7306 |
| 3 | 4 | 1 | 1 | 266.6402 | 0.6158 |
| 3 | 4 | 1 | 2 | 281.1253 | 0.6493 |

|   |   |   |   |          |        |
|---|---|---|---|----------|--------|
| 3 | 4 | 3 | 1 | 229.1353 | 0.5292 |
| 3 | 4 | 3 | 2 | 206.2982 | 0.4764 |
| 3 | 4 | 5 | 1 | 210.0216 | 0.4850 |
| 3 | 4 | 5 | 2 | 234.0256 | 0.5405 |
| 3 | 6 | 0 | 0 | 249.7958 | 0.5769 |
| 3 | 6 | 1 | 1 | 233.9535 | 0.5403 |
| 3 | 6 | 1 | 2 | 236.9061 | 0.5471 |
| 3 | 6 | 3 | 1 | 221.4159 | 0.5114 |
| 3 | 6 | 3 | 2 | 296.6629 | 0.6851 |
| 3 | 6 | 5 | 1 | 172.1528 | 0.3976 |
| 3 | 6 | 5 | 2 | 171.377  | 0.3958 |
| 3 | 7 | 1 | 1 | 263.3831 | 0.6083 |
| 3 | 7 | 1 | 2 | 336.7051 | 0.7776 |
| 3 | 7 | 3 | 1 | 322.9365 | 0.7458 |
| 3 | 7 | 3 | 2 | 369.1289 | 0.8525 |
| 3 | 7 | 5 | 1 | 207.8079 | 0.4799 |
| 3 | 7 | 5 | 2 | 297.2461 | 0.6865 |
| 4 | 1 | 1 | 1 | 242.6749 | 0.5605 |
| 4 | 1 | 1 | 2 | 262.616  | 0.6065 |
| 4 | 1 | 3 | 1 | 203.2396 | 0.4694 |
| 4 | 1 | 3 | 2 | 351.9744 | 0.8129 |
| 4 | 1 | 5 | 1 | 171.0575 | 0.3951 |
| 4 | 1 | 5 | 2 | 288.24   | 0.6657 |
| 4 | 2 | 1 | 2 | 344.1634 | 0.7948 |
| 4 | 2 | 3 | 1 | 302.0503 | 0.6976 |

|   |   |   |   |          |        |
|---|---|---|---|----------|--------|
| 4 | 2 | 3 | 2 | 433.9326 | 1.0022 |
| 4 | 2 | 5 | 1 | 359.5275 | 0.8303 |
| 4 | 2 | 5 | 2 | 334.1975 | 0.7718 |
| 4 | 3 | 1 | 1 | 284.2208 | 0.6564 |
| 4 | 3 | 1 | 2 | 426.9365 | 0.9860 |
| 4 | 3 | 3 | 2 | 397.3319 | 0.9176 |
| 4 | 3 | 5 | 2 | 230.9049 | 0.5333 |
| 4 | 4 | 0 | 0 | 192.9268 | 0.4456 |
| 4 | 4 | 1 | 1 | 241.2322 | 0.5571 |
| 4 | 4 | 1 | 2 | 237.7363 | 0.5490 |
| 4 | 4 | 3 | 1 | 193.2204 | 0.4462 |
| 4 | 4 | 3 | 2 | 232.556  | 0.5371 |
| 4 | 4 | 5 | 1 | 209.638  | 0.4842 |
| 4 | 4 | 5 | 2 | 229.8224 | 0.5308 |
| 4 | 7 | 0 | 0 | 118.616  | 0.2739 |
| 4 | 7 | 1 | 1 | 264.2917 | 0.6104 |
| 4 | 7 | 1 | 2 | 312.1487 | 0.7209 |
| 4 | 7 | 3 | 1 | 281.6596 | 0.6505 |
| 4 | 7 | 3 | 2 | 381.5296 | 0.8811 |
| 4 | 7 | 5 | 1 | 357.383  | 0.8254 |
| 4 | 7 | 5 | 2 | 241.813  | 0.5585 |

\* Subgroups are defined by target (1 = Tone1, 2 = Tone2, 3 = Tone3, 4 = Tone4), transcription (1 = Tone1, 2 = Tone2, 3 = Tone3, 4 = Tone4, 6 = semi-Tone3, 7 = uncategorizable), grade (0 = Teacher, 1 = Grade1, 3 = Grade3, 5 = Grade5), group = (0 = Teacher, 1 = heritage speakers of Mandarin, 2 = L2 learners of Mandarin).

\*\*  $d = \text{Subgroup\_Mean} / \text{Subgroup\_Mean}_{\max}$
