# Supplementary material
Source: publisher figshare collection journal article supplement (https://asha.figshare.com/articles/dataset/_/28098206)
Supplement: Supplementary file 4 [file 1]

## Supplemental Material S2. Details of the selected optimal logistic mixed model for tone match.

Generalized linear mixed model fit by maximum likelihood (Laplace Approximation)

Family: binomial ( logit )

Formula: correct ~ 0 + target + group + grade + target:group + target:grade + (1 | speaker) + (1 | word)

Control: glmerControl(optimizer = "bobyqa")

| AIC         | BIC    | logLik | deviance | df.resid |
|-------------|--------|--------|----------|----------|
| <b>1787</b> | 1887.1 | -875.5 | 1751     | 1905     |

Scaled residuals:

| Min            | 1Q     | Median | 3Q     | Max    |
|----------------|--------|--------|--------|--------|
| <b>-5.5894</b> | 0.1085 | 0.2779 | 0.5307 | 1.9923 |

Random effects:

| Groups         | Variance | Std.Dev. |
|----------------|----------|----------|
| <b>speaker</b> | 0.5347   | 0.7313   |
| word           | 0.1373   | 0.3706   |

Number of obs: 1923, groups: speaker, 82; word, 32

Fixed effects:

|                                | Estimate | Std. Error | z value | p value    |
|--------------------------------|----------|------------|---------|------------|
| <b>targetTone1</b>             | 2.4588   | 0.34       | 7.231   | < .001 *** |
| <b>targetTone2</b>             | 2.0578   | 0.3439     | 5.984   | < .001 *** |
| <b>targetTone3</b>             | 0.6466   | 0.2616     | 2.472   | .013 *     |
| <b>targetTone4</b>             | 2.4306   | 0.3441     | 7.064   | < .001 *** |
| <b>groupL2</b>                 | -2.0653  | 0.3504     | -5.894  | < .001 *** |
| <b>gradeGrade3</b>             | 1.2315   | 0.4255     | 2.894   | .004 **    |
| <b>gradeGrade5</b>             | 0.1126   | 0.3785     | 0.297   | .766       |
| targetTone2:groupL2            | 0.8798   | 0.4726     | 1.861   | .063       |
| <b>targetTone3:groupL2</b>     | 1.2495   | 0.3616     | 3.455   | < .001 *** |
| <b>targetTone4:groupL2</b>     | -0.3723  | 0.4272     | -0.871  | .384       |
| targetTone2:gradeGrade3        | -0.2893  | 0.5471     | -0.529  | .597       |
| targetTone3:gradeGrade3        | -0.5644  | 0.4387     | -1.287  | .198       |
| targetTone4:gradeGrade3        | -0.533   | 0.512      | -1.041  | .298       |
| targetTone2:gradeGrade5        | 1.3798   | 0.5544     | 2.489   | .013 *     |
| <b>targetTone3:gradeGrade5</b> | -0.1984  | 0.3927     | -0.505  | .613       |
| targetTone4:gradeGrade5        | 0.4004   | 0.4646     | 0.862   | .389       |

Significant codes: \*\*\*  $p < .001$ , \*\*  $p < .01$ , \*  $p < .05$
